# Supplementary material
Source: publisher figshare collection journal article supplement (https://plos.figshare.com/articles/dataset/_/1044847)
Supplement: Supplementary file 1 [file 1 › Figure_S1.pdf]

## Apoptosis (cPARP)

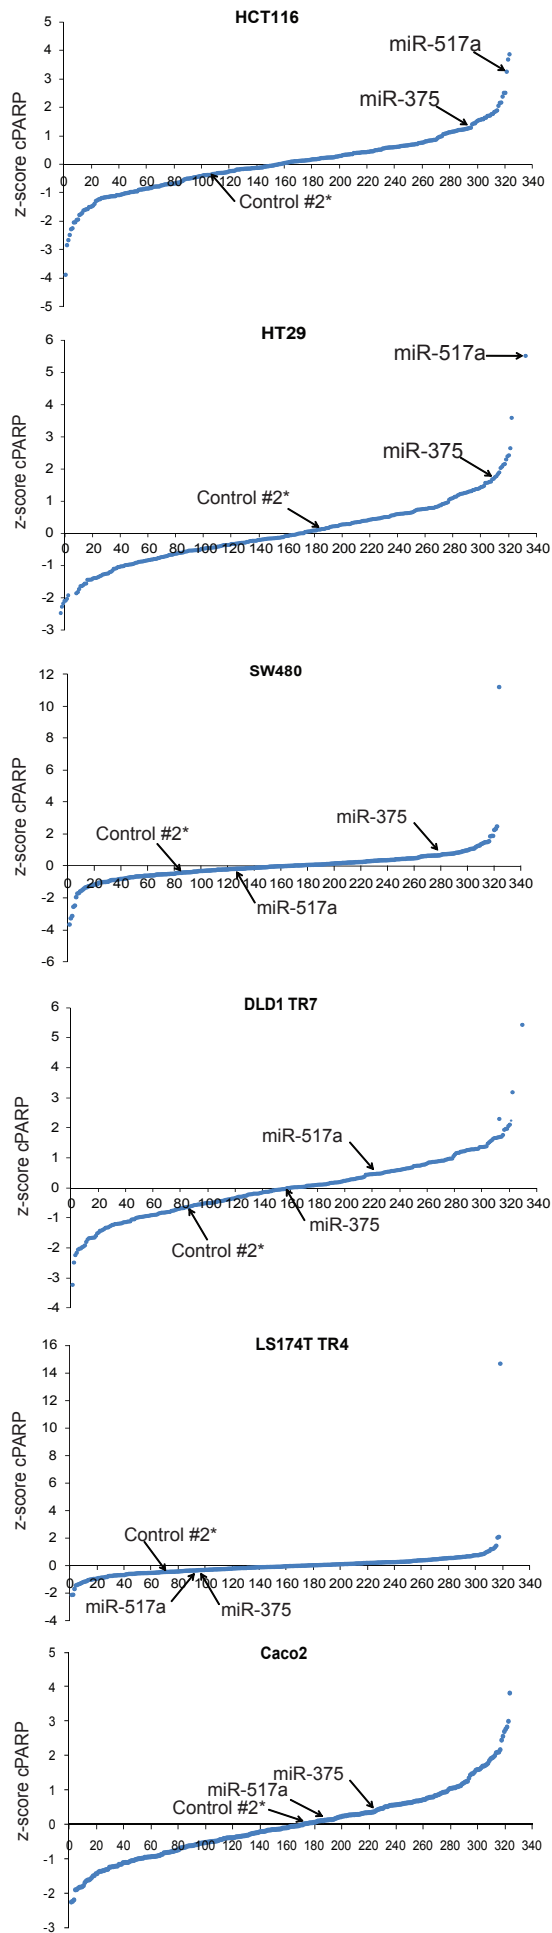

## Proliferation (Ki67)

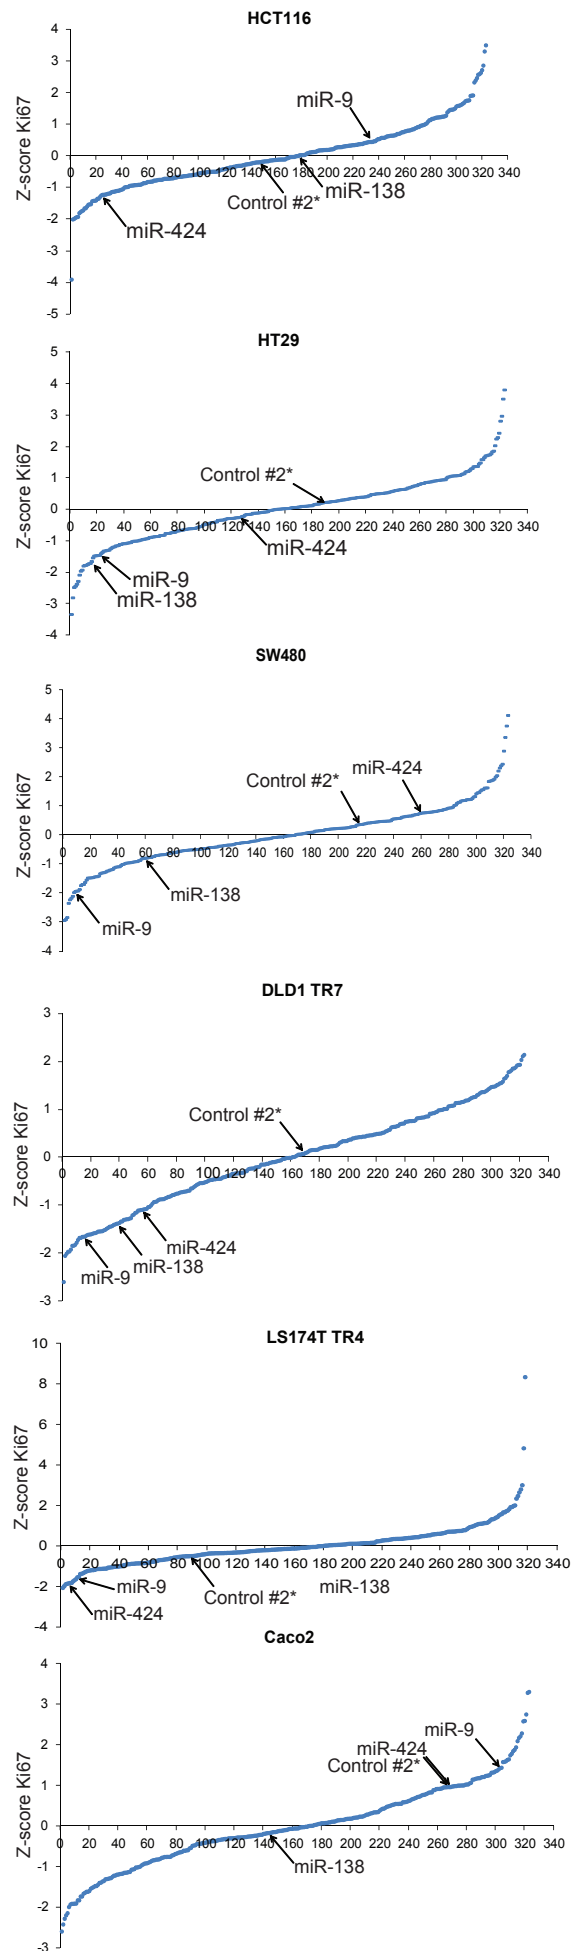

Supplementary Fig. S1. Line graph distributions of the cPARP and Ki67 z-scores for each pre-miR in six CRC cells lines. Selected miRNAs are shown.\*Pre-mir negative control #2
