# Supplementary material
Source: publisher figshare collection journal article supplement (https://plos.figshare.com/articles/dataset/_/1044847)
Supplement: Supplementary file 1 [file 1 › Figure_S2.pdf]

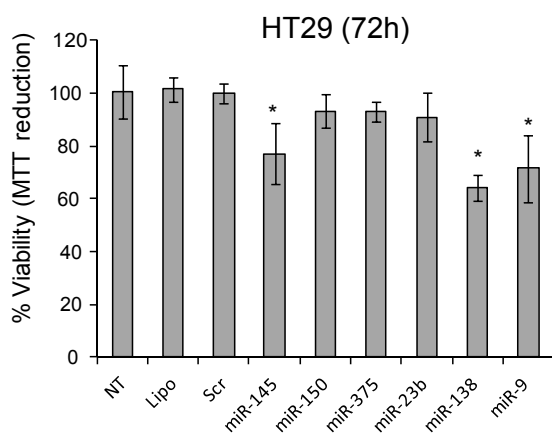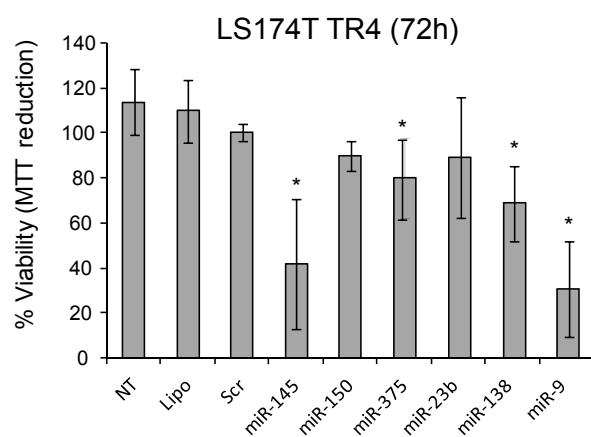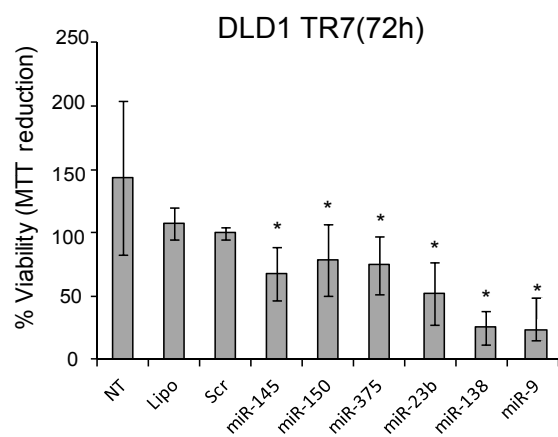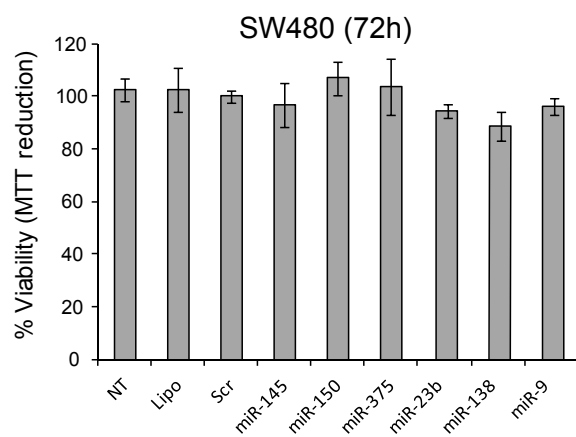

Supplementary Fig. S2. Cellular viability (MTT assay) upon ectopic expression of the miRNAs. Data are presented as  $\pm$ sd. of at least 3 independent experiments each with three biological replicates and normalized to Scr. \*p-value <0.05 and MTT reduction >20%. The pre-miR-145 and Scr were included as positive and negative controls respectively. Non treated cells (NT) and Lipofectamine only (Lipo).
