# Supplementary material
Source: publisher figshare collection journal article supplement (https://plos.figshare.com/articles/dataset/_/1044847)
Supplement: Supplementary file 1 [file 1 › Figure_S4.pdf]

miR-9

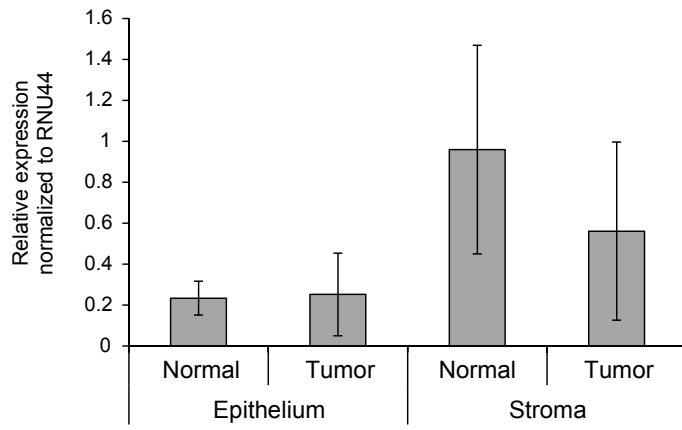

miR-138

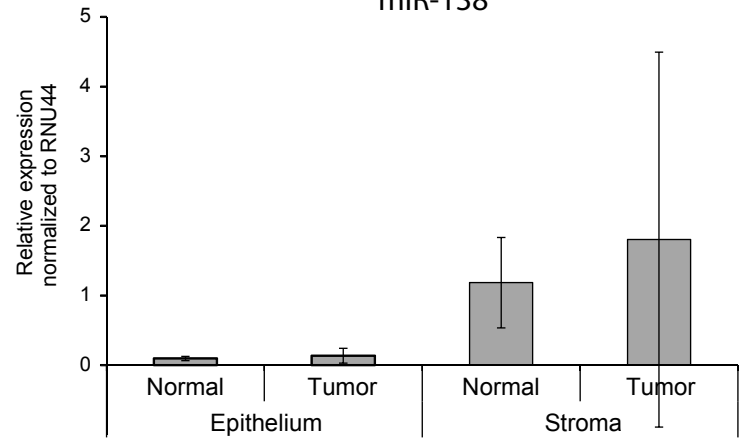

Supplementary Fig. S4. The expression of miR-9 and miR-138 in laser capture microdissected colorectal cancer tissue. The expression was analyzed in epithelial and stromal cells from 3 paired colorectal adenocarcinomas and adjacent normal colon mucosa using RT-qPCR. The columns represent the mean expression in three samples  $\pm$  sd.
