# Supplementary material
Source: publisher figshare collection journal article supplement (https://plos.figshare.com/articles/dataset/_/1044847)
Supplement: Supplementary file 1 [file 1 › Figure_S5.pdf]

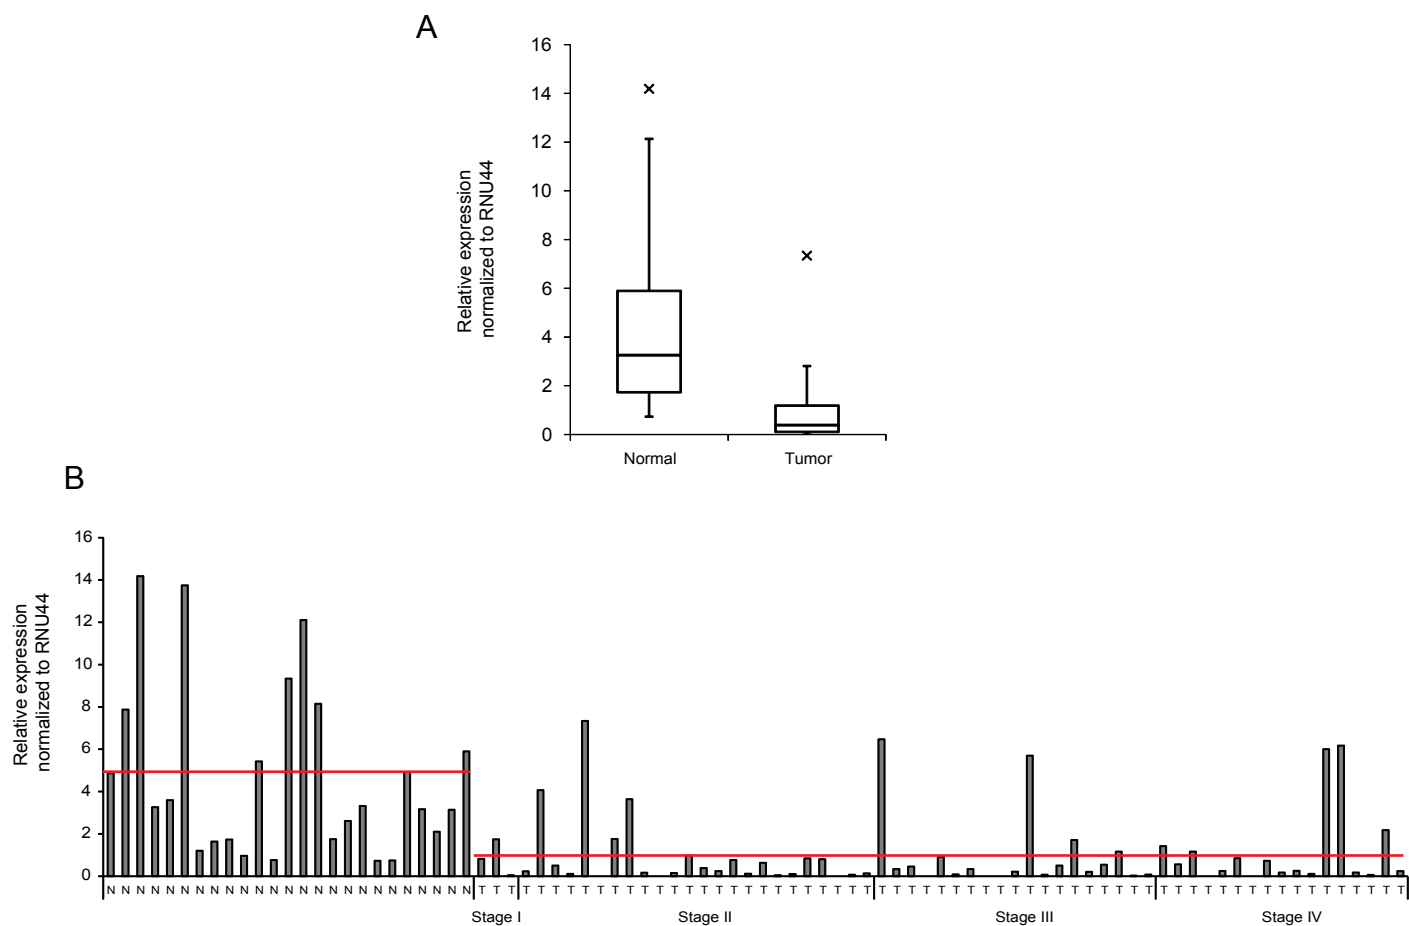

Supplementary Fig. S5. miR-375 expression in cohort 2. (A) Box plots comparing the relative expression of miR-375 in 25 samples from normal colon mucosa and 63 primary MSS stage I-IV CRCs (T2-4, N0-3, M0/1) × Minimum and maximum outliers. (B) The miR-375 expression in individual samples. The expression was measured in triplicates using RT-qPCR and normalized to RNU44. The red bars shows the mean in the normal mucosa (N)(mean = 4.7) and the tumors (T)(mean = 1.0).
