# Supplementary material
Source: publisher figshare collection journal article supplement (https://plos.figshare.com/articles/dataset/_/1044847)
Supplement: Supplementary file 1 [file 1 › Figure_S6.pdf]

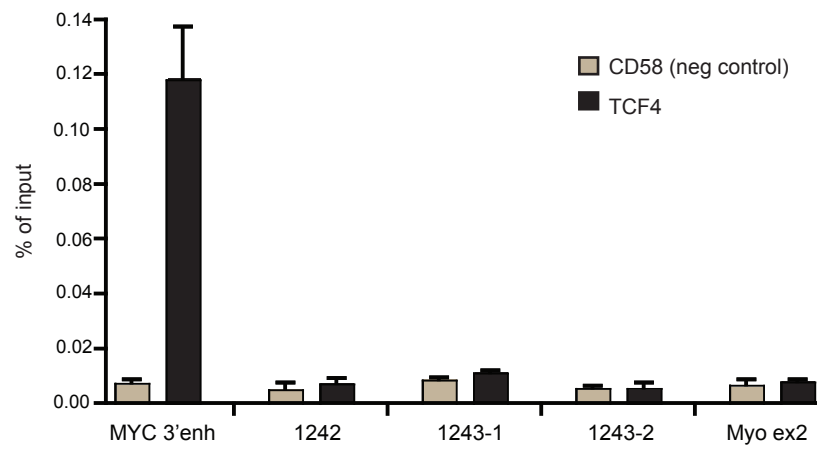

Supplementary Fig. S6. Association of TCF4 with chromatin in the genomic region of miR-375 using ChIP followed by qPCR. MYC 3'enhancer region (3'enh) = positive control region and Myo ex2 = negative control region. The CD58 antibody was used as a negative control.
