# Supplementary material
Source: publisher figshare collection journal article supplement (https://plos.figshare.com/articles/dataset/_/1044847)
Supplement: Supplementary file 1 [file 1 › Figure_S7.pdf]

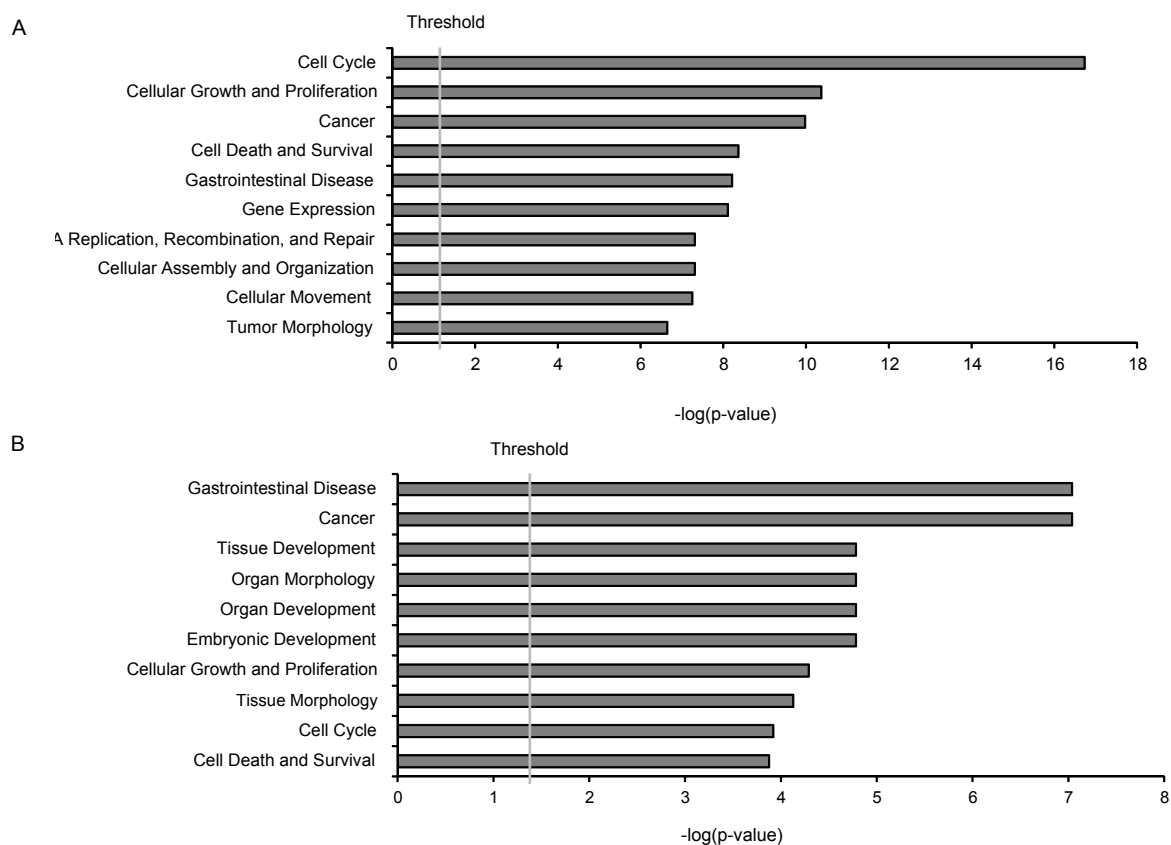

Supplementary Fig. S7. Ingenuity pathway analysis of genes affected by miR-375 over-expression. Biological functions significantly associated with altered intracellular levels of miR-375 in HCT116 cells 48 h post transfection. Only mRNAs demonstrating p-values < 0.05 and log2 ratios < -0.5 or > 0.5 (1236 genes) (A) or < -1.0 or > 1.0 (206 genes) (B), comparing miR-375 and Scr transfected cells, were included in the analyses. Threshold:  $p=0.05$ . The analyses were based on knowledge from all species, all tissues, and all data sources.
