# Supplementary material
Source: publisher figshare collection journal article supplement (https://plos.figshare.com/articles/dataset/_/1044847)
Supplement: Supplementary file 1 [file 1 › Figure_S8.pdf]

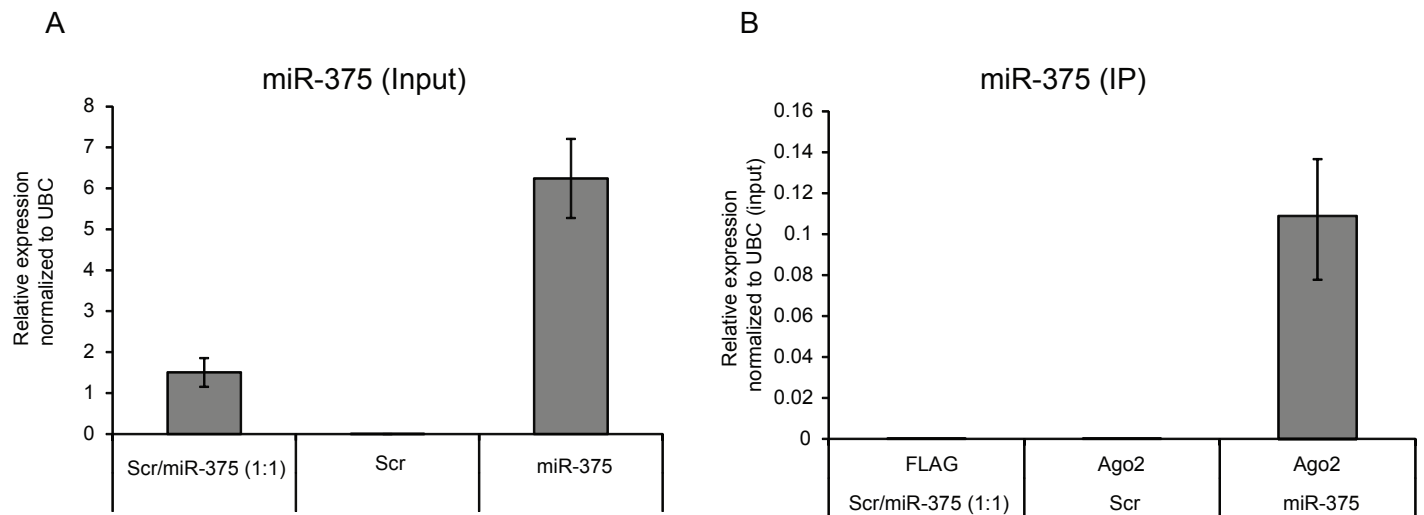

Supplementary Fig. S8. Ago2 immunoprecipitation from cell lysates of miR-375 or Scr transfected cells. (A) RT-qPCR expression analysis of miR-375 in the cell lysates (input) used for Ago2 immunoprecipitation. (B) Ago2 immunoprecipitation from the cell lysates (IP) followed by miR-375 expression analysis using RT-qPCR. Immunoprecipitation with a FLAG antibody was used as negative control. A 1:1 ratio of the lysates from miR-375 and Scr transfected cells was used for FLAG immunoprecipitation. The columns represent the mean of 3 replicates  $\pm$  sd.
